# Supplementary material
Source: MDPI journal article supplement (https://www.mdpi.com/2072-4292/11/14/1697)
Supplement: s1 [file s1]

**Table S1.** Urban river Ecosystem Services Classification according to CICES 5.1. Author's work adapted from Haines-Young and Potschin [21] and Maes et al. [34,35]

| Section                  | Division | Group                                                                     | Class                                                                                                                           | Indicator                                                                                                                                                                                                                                                      |
|--------------------------|----------|---------------------------------------------------------------------------|---------------------------------------------------------------------------------------------------------------------------------|----------------------------------------------------------------------------------------------------------------------------------------------------------------------------------------------------------------------------------------------------------------|
| Provisioning<br>(Biotic) | Biomass  | Cultivated terrestrial plants for nutrition, materials or energy          | Cultivated terrestrial plants (including fungi, algae) grown for nutritional purposes                                           | - Production of food (ton ha <sup>-1</sup> year <sup>-1</sup> )<br>- Surface of community gardens/small plots for self-consumption (ha)                                                                                                                        |
|                          |          | Wild plants (terrestrial and aquatic) for nutrition, materials or energy  | Wild plants (terrestrial and aquatic, including fungi, algae) used for nutrition                                                | - Wild plants used in gastronomy, cosmetic, pharmaceutical uses (data on industries collecting the plants)                                                                                                                                                     |
|                          |          |                                                                           | Fibres and other materials from wild plants for direct use or processing (excluding genetic materials)                          |                                                                                                                                                                                                                                                                |
|                          |          | Reared aquatic animals for nutrition, materials or energy                 | Animals reared by in-situ aquaculture for nutritional purposes                                                                  | - Freshwater aquaculture production (e.g. sturgeon and caviar production)                                                                                                                                                                                      |
|                          |          |                                                                           | Fibres and other materials from animals grown by in-situ aquaculture for direct use or processing (excluding genetic materials) |                                                                                                                                                                                                                                                                |
|                          |          |                                                                           | Animals reared by in-situ aquaculture as an energy source                                                                       |                                                                                                                                                                                                                                                                |
|                          |          | Wild animals (terrestrial and aquatic) for nutrition, materials or energy | Wild animals (terrestrial and aquatic) used for nutritional purposes                                                            | - Fish production (catch in tons by commercial and recreational fisheries)<br>- Number of fisherman and hunters of waterfowls (anglers, professional and amateur fishermen)<br>- Status of fish population (Species composition, Age Structure, Biomass kg/ha) |

| Section                           | Division                                                       | Group                                                                               | Class                                                                                          | Indicator                                                                                                                                                                                                                                                                                                                                                                                                             |
|-----------------------------------|----------------------------------------------------------------|-------------------------------------------------------------------------------------|------------------------------------------------------------------------------------------------|-----------------------------------------------------------------------------------------------------------------------------------------------------------------------------------------------------------------------------------------------------------------------------------------------------------------------------------------------------------------------------------------------------------------------|
| Regulation & Maintenance (Biotic) | Transformation of biochemical or physical inputs to ecosystems | Mediation of wastes or toxic substances of anthropogenic origin by living processes | Bio-remediation by micro-organisms, algae, plants, and animals                                 | - Indicators on water quality (microbiological data for bathing waters, BOD5 nitrate conc, phosphate conc, oxygen conditions, saprobiological status)                                                                                                                                                                                                                                                                 |
|                                   |                                                                |                                                                                     | Filtration/sequestration/storage/accumulation by micro-organisms, algae, plants, and animals   | - Nutrient loads<br>- Ecological status<br>- Trophic status<br>- Area occupied by riparian forests<br>- Number and efficiency of treatment plants<br>- Waste treated<br>- Pollutants removed by vegetation (in leaves, stems and roots) ( $\text{kg ha}^{-1} \text{ year}^{-1}$ )<br>- Dry deposition velocity ( $\text{mm s}^{-1}$ )<br>- Population exposed to high concentration of pollutants (% on surface area) |
|                                   |                                                                | Mediation of nuisances of anthropogenic origin                                      | Noise attenuation                                                                              | - Leaf Area Index + distance to roads (m)<br>- Noise reduction rates applied to UGI within a defined road buffer $\text{dB(A) m}^{-2}$ vegetation unit (Derkzen et al. 2015)                                                                                                                                                                                                                                          |
|                                   | Regulation of physical, chemical, biological conditions        | Regulation of baseline flows and extreme events                                     | Buffering and attenuation of mass movement                                                     | - Sediment retention                                                                                                                                                                                                                                                                                                                                                                                                  |
|                                   |                                                                |                                                                                     | Hydrological cycle and water flow regulation (Including flood control, and coastal protection) | - Hydrological flow data<br>- Share of green areas in zones in danger of floods (%)<br>- Population exposed to flood risk (% per unit area)<br>- Areas exposed to flooding (ha)<br>- Holding capacity flood risk maps<br>- Conservation of river and lakes banks                                                                                                                                                      |
|                                   |                                                                | Lifecycle maintenance, habitat and gene pool protection                             | Pollination (or 'gamete' dispersal in a marine context)                                        | - Capacity of ecosystems to sustain insect pollinators activity (dimensionless) (Zulian et al. 2013)<br>- Relative abundance (number over area or over length)                                                                                                                                                                                                                                                        |
|                                   |                                                                | Lifecycle maintenance, habitat and gene pool protection                             | Maintaining nursery populations and habitats (Including gene pool protection)                  | - Biodiversity value (Species diversity or abundance, endemics or red list species and spawning location)<br>- Ecological status Morphological status                                                                                                                                                                                                                                                                 |

| Section                           | Division                                                                                                          | Group                                                           | Class                                                                                                                                              | Indicator                                                                                                                                                                                                        |
|-----------------------------------|-------------------------------------------------------------------------------------------------------------------|-----------------------------------------------------------------|----------------------------------------------------------------------------------------------------------------------------------------------------|------------------------------------------------------------------------------------------------------------------------------------------------------------------------------------------------------------------|
| Regulation & Maintenance (Biotic) | Regulation of physical, chemical, biological conditions                                                           | Lifecycle maintenance, habitat and gene pool protection         | Maintaining nursery populations and habitats (Including gene pool protection)                                                                      | - Biodiversity value (Species diversity or abundance, endemics or red list species and spawning location)<br>- Ecological status Morphological status                                                            |
|                                   |                                                                                                                   | Pest and disease control                                        | Pest control (including invasive species)                                                                                                          | - Alien species (Introduced riparian and aquatic plants<br>- Number of introduced aquatic invertebrates<br>- Number of introduced vertebrates in rivers and riparian areas                                       |
|                                   |                                                                                                                   | Regulation of soil quality                                      | Weathering processes and their effect on soil quality                                                                                              | - Fluvisols surface                                                                                                                                                                                              |
|                                   |                                                                                                                   | Water conditions                                                | Regulation of the chemical condition of freshwaters by living processes                                                                            | - Chemical status<br>- Ecological status                                                                                                                                                                         |
|                                   |                                                                                                                   | Atmospheric composition and conditions                          | Regulation of chemical composition of atmosphere and oceans                                                                                        | - C sequestration (Annual increase in<br>- Carbon sequestration in living biomass of riparian forest<br>- Carbon sequestered by plantations of Populus<br>- Organic carbon stored in fluvisols)                  |
|                                   |                                                                                                                   |                                                                 | Regulation of temperature and humidity, including ventilation and transpiration                                                                    | - Leaf Area Index<br>- Temperature decreases by tree cover ( $^{\circ}\text{C m}^{-2}$ )<br>- Cooling capacity of UGI<br>- Population exposed to high temperatures (% per unit area)                             |
| Cultural (Biotic)                 | Direct, in-situ and outdoor interactions with living systems that depend on presence in the environmental setting | Physical and experiential interactions with natural environment | Characteristics of living systems that enable activities promoting health, recuperation or enjoyment through active or immersive interactions      | - Number of visitors (to National Parks including lakes or rivers)<br>- National Parks and Natura 2000 sites<br>- Known bird watching sites Waterfowl                                                            |
|                                   |                                                                                                                   |                                                                 | Characteristics of living systems that enable activities promoting health, recuperation or enjoyment through passive or observational interactions | - Number of visitors<br>- bathing areas and Number beaches<br>- Fishing reserves<br>- Fish abundance<br>- Fish monetary value from angling<br>- Number fishing licenses<br>- Quality of fresh waters for fishing |

| Section                   | Division                                                                                                                  | Group                                                                 | Class                                                                                                                      | Indicator                                                                                                                                                                                                                   |
|---------------------------|---------------------------------------------------------------------------------------------------------------------------|-----------------------------------------------------------------------|----------------------------------------------------------------------------------------------------------------------------|-----------------------------------------------------------------------------------------------------------------------------------------------------------------------------------------------------------------------------|
| Cultural<br>(Biotic)      | Direct, in-situ and outdoor interactions with living systems that depend on presence in the environmental setting         | Intellectual and representative interactions with natural environment | Characteristics of living systems that enable scientific investigation or the creation of traditional ecological knowledge | - Monitoring sites (by scientists)<br>- Number of scientific projects, articles, studies<br>- Classified sites (world heritage, label European tourism)                                                                     |
|                           |                                                                                                                           |                                                                       | Characteristics of living systems that enable education and training                                                       | - Number of visitors<br>- National Parks and Natura 2000 sites                                                                                                                                                              |
|                           |                                                                                                                           |                                                                       | Characteristics of living systems that are resonant in terms of culture or heritage                                        | - Number of visitors<br>- Natural heritage and cultural sites<br>- Number of annual cultural activities organized                                                                                                           |
|                           |                                                                                                                           |                                                                       | Elements of living systems used for entertainment or representation                                                        | - Number of visitors<br>(surface or number of wetlands located next to a bike path)                                                                                                                                         |
|                           |                                                                                                                           |                                                                       | Characteristics of living systems that enable aesthetic experiences                                                        | - Number of visitors<br>- Contrasting landscapes (lakes close to mountains)<br>- Proximity to urban areas of scenic rivers or lakes                                                                                         |
|                           | Indirect, remote, often indoor interactions with living systems that do not require presence in the environmental setting | Spiritual, symbolic and other interactions with natural environment   | Elements of living systems that have symbolic meaning                                                                      | - National species or habitat types                                                                                                                                                                                         |
|                           |                                                                                                                           |                                                                       | Elements of living systems that have sacred or religious meaning                                                           | - sacred/religious sites (catastrophic events, religious places)                                                                                                                                                            |
|                           |                                                                                                                           | Other biotic characteristics that have a non-use value                | Characteristics or features of living systems that have an existence value                                                 | - Number of visitors (to National Parks including lakes)<br>- Number of fishing licenses                                                                                                                                    |
|                           |                                                                                                                           |                                                                       | Characteristics or features of living systems that have an option or bequest value                                         | - Number of association registered on animals, plants, environment, naturism                                                                                                                                                |
| Provisioning<br>(Abiotic) | Water                                                                                                                     | Surface water used for nutrition, materials or energy                 | Surface water for drinking                                                                                                 | - Drinking water provision ( $\text{m}^3 \text{ ha}^{-1} \text{ year}^{-1}$ )<br>- Drinking water consumption ( $\text{m}^3 \text{ year}^{-1}$ )<br>- Surface water availability<br>- Water abstracted                      |
|                           |                                                                                                                           |                                                                       | Surface water used as a material (non-drinking purposes)                                                                   | - Water provision ( $\text{m}^3 \text{ ha}^{-1} \text{ year}^{-1}$ )<br>- Water consumption per sector ( $\text{m}^3 \text{ year}^{-1}$ )<br>- Surface water availability<br>- Water abstracted<br>- Volume of water bodies |
